# Supplementary material for: A novel approach for geographical risk mapping of morbidity and mortality rates: the case of Val D’Agri, Italy
Source: Springer Nature journal article supplement (doi:10.1038/s41598-019-46479-z), 2019-07-17
Supplement: MOESM1 [file 41598_2019_46479_MOESM1_ESM.pdf]

# **A novel approach for geographical risk mapping of morbidity and mortality rates: the case of Val D'Agri, Italy**

Andrea Duggento (1), Nicola Toschi (1), Antonio Pietroiusti (1), Loredana Musmeci (2) , Ersilia Buonomo (1) , Stefania Moramarco (1), Francesca Lucaroni (1), Paolo Boffetta (3), Leonardo Palombi (1).

1. Department of Biomedicine and Prevention, University of Rome Tor Vergata, Rome, Italy.
2. Hench Legal & Compliance Consulting, Rome, Italy
3. Tisch Cancer Institute, Icahn School of Medicine at Mount Sinai, New York, NY, USA

\*Corresponding author:

Paolo Boffetta, MD, MPH

Tisch Cancer Institute

Icahn School of Medicine at Mount Sinai

One Gustave L. Levy Place, Box 1130

New York NY 10029 USA

Tel. +1-212-824-7378

Email [paolo.boffetta@mssm.edu](mailto:paolo.boffetta@mssm.edu)

ORCID 0000-0002-3811-2791

Supplementary Figure 1. List of municipalities in Basilicata Region.

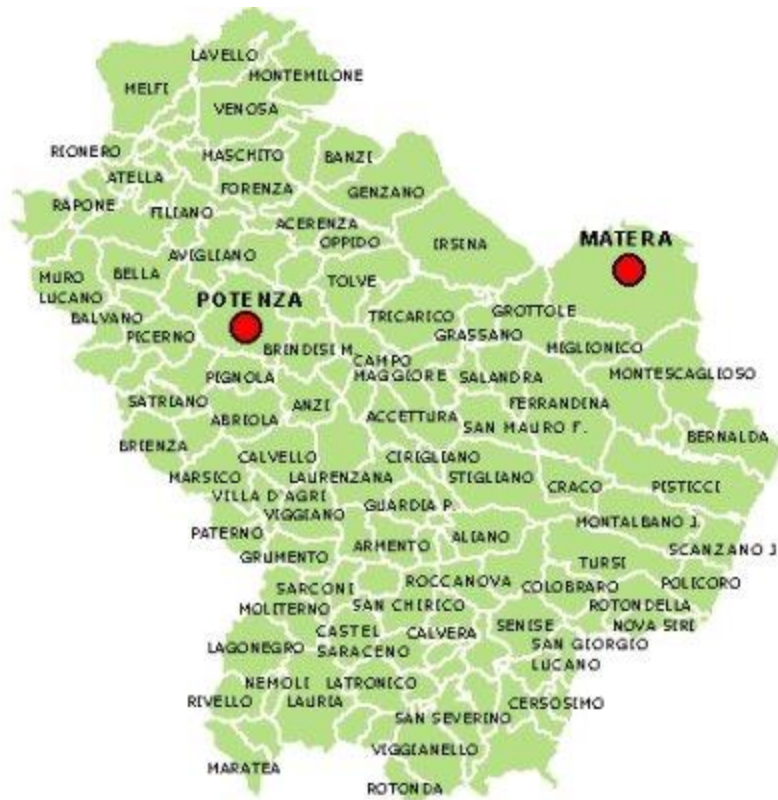

Supplementary Table 1. SMR for all causes

| Municipality | SMR (vs It) | p-value  |
|--------------|-------------|----------|
| Abriola      | 1.284195    | 0.000422 |
| Acerenza     | 1.019796    | 0.225199 |
| AlbanoDiLu   | 1.089354    | 0.198869 |
| Anzi         | 1.04702     | 0.08835  |
| Armento      | 1.236111    | 0.006131 |
| Atella       | 0.942631    | 0.142943 |
| Avigliano    | 1.085331    | 0.01084  |
| Balvano      | 1.072651    | 0.355496 |
| Banzi        | 0.937223    | 0.276089 |
| Baragiano    | 0.951498    | 0.30205  |
| Barile       | 0.939562    | 0.04968  |
| Bella        | 0.907869    | 0.011962 |
| Brienza      | 1.09081     | 0.063503 |
| BrindisiMor  | 1.031704    | 0.262785 |
| Calvello     | 1.116805    | 7.77E-06 |
| Calvera      | 1.131172    | 0.185657 |
| Campomaç     | 1.086131    | 0.334274 |
| Cancellara   | 1.048297    | 0.317939 |
| Carbone      | 0.772659    | 0.002578 |
| SanPaoloA    | 0.980002    | 0.249556 |
| Castelgran   | 0.992407    | 0.286957 |
| Castellucci  | 0.983469    | 0.1939   |
| Castellucci  | 0.985158    | 0.110153 |
| Castelmez    | 0.904434    | 0.102044 |
| Castelsara   | 0.922718    | 0.206392 |
| Castronuov   | 1.066589    | 0.417267 |
| Cersosimo    | 1.011893    | 0.19404  |
| Chiaromon    | 1.129738    | 0.009323 |
| CorletoPer   | 1.217467    | 0.003996 |
| Episcopia    | 0.855916    | 0.139253 |
| Fardella     | 1.023194    | 0.045427 |
| Filiano      | 1.026401    | 0.122481 |
| Forenza      | 0.961459    | 0.181991 |
| Franravilla  | 0.938319    | 0.493398 |
| Galicchio    | 0.922278    | 0.008998 |
| GenzanoDi    | 1.026957    | 0.000213 |
| Grumenton    | 1.090808    | 0.276028 |
| GuardiaPe    | 1.317144    | 0.002804 |
| Lagonegro    | 1.132234    | 0.00277  |
| Latronico    | 0.986061    | 0.368186 |
| Laurenzan    | 1.051959    | 0.393489 |
| Lauria       | 1.07902     | 0.036646 |
| Lavello      | 0.971366    | 0.112488 |
| Maratea      | 0.950615    | 0.138093 |
| MarsicoNu    | 0.980962    | 0.476118 |
| Marsicovet   | 1.032567    | 0.130887 |
| Maschito     | 0.970301    | 0.410832 |
| Melfi        | 1.028136    | 0.21349  |
| Missanello   | 1.258761    | 0.016768 |
| Moliterno    | 1.100118    | 0.037913 |

|              |          |          |
|--------------|----------|----------|
| Montemilor   | 1.050661 | 0.40436  |
| Montemurr    | 1.05296  | 0.384817 |
| MuroLucar    | 0.94293  | 0.067086 |
| Nemoli       | 1.168089 | 0.018579 |
| Noepoli      | 1.054285 | 0.413654 |
| OppidoLuc    | 1.056502 | 0.178183 |
| PalazzoSai   | 1.123574 | 0.014963 |
| Pescopage    | 1.076232 | 0.197944 |
| Picerno      | 1.052767 | 0.404982 |
| Pietragalla  | 0.928863 | 0.040272 |
| Pietraperto  | 1.091216 | 0.03349  |
| Pignola      | 0.964825 | 0.445054 |
| Potenza      | 1.04863  | 0.35552  |
| Rapolla      | 1.000663 | 0.173196 |
| Rapone       | 1.03959  | 0.278066 |
| RioneroInV   | 0.98552  | 0.298989 |
| Ripacandic   | 0.994405 | 0.039574 |
| Rivello      | 1.044775 | 0.253635 |
| Roccanova    | 0.995073 | 0.308772 |
| Rotonda      | 0.878708 | 0.050445 |
| Ruoti        | 1.035732 | 0.396205 |
| RuvoDelMc    | 0.935736 | 0.18709  |
| SanChirico   | 0.981394 | 0.390804 |
| SanChirico   | 0.957065 | 0.476269 |
| SanCostan    | 0.872718 | 0.061914 |
| SanFele      | 0.968944 | 0.310661 |
| SanMartinc   | 0.84448  | 0.004554 |
| SanSeverir   | 1.016687 | 0.13865  |
| SantAngelc   | 0.95731  | 0.35911  |
| SantArcanç   | 1.088716 | 0.289963 |
| Sarconi      | 1.073051 | 0.374763 |
| SassoDiCa    | 1.047292 | 0.230694 |
| SatrianoDil  | 1.140596 | 0.070681 |
| SavoiaDiLu   | 1.042216 | 0.289322 |
| Senise       | 1.240866 | 0.000278 |
| Spinoso      | 0.813195 | 0.009637 |
| Teana        | 1.106296 | 0.024178 |
| TerranovaI   | 1.123042 | 0.077796 |
| Tito         | 1.116159 | 0.248112 |
| Tolve        | 1.027858 | 0.150198 |
| Tramutola    | 1.001743 | 0.114278 |
| Trecchina    | 0.977031 | 0.454174 |
| Trivigno     | 1.056728 | 0.419905 |
| VaglioBasil  | 0.956358 | 0.431337 |
| Venosa       | 0.984215 | 0.136233 |
| VietriDiPotr | 1.009509 | 0.000374 |
| Viggianello  | 0.976098 | 0.092184 |
| Viggiano     | 0.991545 | 0.195698 |
| Ginestra     | 1.008324 | 0.152275 |
| Paterno      | 1.239345 | 0.000344 |
| Accettura    | 1.034905 | 0.220651 |
| Aliano       | 0.9838   | 0.385198 |

|                 |          |          |
|-----------------|----------|----------|
| Bernalda        | 1.093028 | 0.01341  |
| Calciano        | 0.986221 | 0.323357 |
| Cirigliano      | 0.883794 | 0.193693 |
| Colobraro       | 1.107808 | 0.241736 |
| Craco           | 1.213531 | 0.067583 |
| Ferrandina      | 1.00879  | 0.165211 |
| Garaguso        | 1.003361 | 0.143251 |
| Gorgoglion      | 1.063942 | 0.285729 |
| Grassano        | 0.975795 | 0.256029 |
| Grottole        | 1.119784 | 0.13005  |
| Irsina          | 1.013131 | 0.045266 |
| Matera          | 0.886804 | 0.001667 |
| Miglionico      | 0.997743 | 0.24504  |
| Montalbano      | 1.113508 | 0.006684 |
| Montescaglioso  | 0.911186 | 0.001126 |
| Nova Siri       | 0.994828 | 0.381648 |
| Oliveto Lucania | 1.168132 | 0.171393 |
| Pisticci        | 1.090716 | 0.004776 |
| Policoro        | 1.011824 | 0.225637 |
| Pomarico        | 1.030893 | 0.180935 |
| Rotondella      | 1.089528 | 0.149008 |
| Salandra        | 1.083753 | 0.277942 |
| San Giorgio     | 0.934573 | 0.18769  |
| San Mauro       | 0.96391  | 0.363661 |
| Stigliano       | 1.003996 | 0.059756 |
| Tricarico       | 1.040618 | 0.484237 |
| Tursi           | 0.922667 | 0.002517 |
| Valsinni        | 0.9769   | 0.340012 |
| Scanzano        | 1.123359 | 0.112439 |

Supplementary Table 2. SMR for cancer

| Municipality | SMR (vs It) | p-value  |
|--------------|-------------|----------|
| Abriola      | 1.104583    | 0.469651 |
| Acerenza     | 0.779325    | 0.011052 |
| AlbanoDiLu   | 0.910973    | 0.48204  |
| Anzi         | 1.034147    | 0.051499 |
| Armento      | 1.035524    | 0.111218 |
| Atella       | 0.964298    | 0.451674 |
| Avigliano    | 0.90487     | 0.028136 |
| Balvano      | 0.815237    | 0.062693 |
| Banzi        | 0.921554    | 0.389773 |
| Baragiano    | 0.789321    | 0.01974  |
| Barile       | 0.753827    | 0.001208 |
| Bella        | 0.789289    | 0.001344 |
| Brienza      | 0.940771    | 0.346088 |
| BrindisiMor  | 0.882464    | 0.447971 |
| Calvello     | 0.956105    | 0.168104 |
| Calvera      | 0.803841    | 0.369541 |
| Campomaç     | 1.023921    | 0.118133 |
| Cancellara   | 0.975649    | 0.19325  |
| Carbone      | 0.674213    | 0.015471 |
| SanPaoloA    | 1.017515    | 0.046636 |
| Castelgran   | 0.740893    | 0.008506 |
| Castellucci  | 0.819515    | 0.198242 |
| Castellucci  | 1.042954    | 0.203227 |
| Castelmez    | 0.996248    | 0.251952 |
| Castelsara   | 0.744566    | 0.018332 |
| Castronuov   | 0.934677    | 0.236094 |
| Cersosimo    | 0.621306    | 0.00089  |
| Chiaromon    | 0.961334    | 0.458548 |
| CorletoPer   | 1.040432    | 0.044921 |
| Episcopia    | 0.72846     | 0.057991 |
| Fardella     | 0.989834    | 0.206106 |
| Filiano      | 0.814914    | 0.019861 |
| Forenza      | 0.679282    | 0.00091  |
| Francavilla  | 0.667383    | 0.022628 |
| Galicchio    | 0.84861     | 0.00609  |
| GenzanoDi    | 0.975483    | 0.164299 |
| Grumenton    | 0.982835    | 0.340989 |
| GuardiaPe    | 0.772381    | 0.11173  |
| Lagonegro    | 1.003825    | 0.196213 |
| Latronico    | 0.840887    | 0.013122 |
| Laurenzan    | 0.930286    | 0.438696 |
| Lauria       | 0.775257    | 0.000807 |
| Lavello      | 0.87915     | 0.003335 |
| Maratea      | 0.702551    | 0.000741 |
| MarsicoNu    | 0.764659    | 0.000714 |
| Marsicovet   | 0.837371    | 0.027964 |
| Maschito     | 0.810283    | 0.066534 |
| Melfi        | 1.003921    | 0.389701 |
| Missanello   | 1.264851    | 0.318046 |
| Moliterno    | 1.026952    | 0.02568  |

|              |          |          |
|--------------|----------|----------|
| Montemilior  | 1.049794 | 0.123462 |
| Montemurr    | 0.811137 | 0.121295 |
| MuroLucar    | 0.856448 | 0.015627 |
| Nemoli       | 0.906753 | 0.48745  |
| Noepoli      | 0.633059 | 0.001844 |
| OppidoLuc    | 0.913899 | 0.123652 |
| PalazzoSai   | 0.905852 | 0.09159  |
| Pescopag     | 0.989613 | 0.337524 |
| Picerno      | 1.020354 | 0.001222 |
| Pietragalla  | 0.75537  | 0.000701 |
| Pietraperto  | 0.836974 | 0.02511  |
| Pignola      | 0.923903 | 0.4249   |
| Potenza      | 0.916824 | 0.225814 |
| Rapolla      | 0.881916 | 0.00072  |
| Rapone       | 1.10522  | 0.462438 |
| RioneroInV   | 0.973016 | 0.294115 |
| Ripacandic   | 0.892337 | 0.001097 |
| Rivello      | 0.912223 | 0.273414 |
| Roccanov     | 0.779429 | 0.00642  |
| Rotonda      | 0.794935 | 0.05769  |
| Ruoti        | 0.737632 | 0.000714 |
| RuvoDelM     | 0.705308 | 0.000668 |
| SanChirico   | 0.922908 | 0.375925 |
| SanChirico   | 0.835047 | 0.126265 |
| SanCostan    | 0.752226 | 0.003957 |
| SanFele      | 0.64309  | 0.007394 |
| SanMartinc   | 0.73005  | 0.000801 |
| SanSeverir   | 0.820755 | 0.193756 |
| SantAngelc   | 0.722297 | 0.141987 |
| SantArcan    | 0.987634 | 0.389396 |
| Sarconi      | 0.76581  | 0.05319  |
| SassoDiCa    | 0.909241 | 0.171018 |
| SatrianoDil  | 0.686338 | 0.012278 |
| SavoiaDiLu   | 0.697814 | 0.043804 |
| Senise       | 0.959431 | 0.453057 |
| Spinoso      | 0.534545 | 0.000706 |
| Teana        | 0.825522 | 0.002514 |
| TerranovaI   | 0.817918 | 0.109483 |
| Tito         | 0.976146 | 0.177236 |
| Tolve        | 0.842136 | 0.161048 |
| Tramutola    | 0.903385 | 0.156983 |
| Trecchina    | 0.784823 | 0.006177 |
| Trivigno     | 0.768002 | 0.004083 |
| VaglioBasil  | 0.899649 | 0.301741 |
| Venosa       | 0.736315 | 0.086216 |
| VietriDiPotr | 0.849389 | 0.153671 |
| Viggianello  | 1.019145 | 0.260268 |
| Viggiano     | 0.750483 | 0.006615 |
| Ginestra     | 0.804536 | 0.008364 |
| Paterno      | 0.914275 | 0.132628 |
| Accettura    | 0.676438 | 0.00192  |
| Aliano       | 0.962653 | 0.276969 |

|                 |          |          |
|-----------------|----------|----------|
| Bernalda        | 0.942381 | 0.144116 |
| Calciano        | 0.702431 | 0.077719 |
| Cirigliano      | 0.832751 | 0.443403 |
| Colobraro       | 1.032822 | 0.063192 |
| Craco           | 1.037456 | 0.194499 |
| Ferrandina      | 0.825275 | 0.001862 |
| Garaguso        | 0.756856 | 0.129604 |
| Gorgoglion      | 0.937322 | 0.469073 |
| Grassano        | 0.881631 | 0.053571 |
| Grottole        | 0.876204 | 0.178548 |
| Irsina          | 0.759368 | 0.001862 |
| Matera          | 0.860338 | 0.002125 |
| Miglionico      | 0.971175 | 0.308316 |
| Montalbano      | 0.951135 | 0.318899 |
| Montescagliano  | 0.893022 | 0.044258 |
| Nova Siri       | 0.838127 | 0.008476 |
| Oliveto Lucania | 0.833217 | 0.415508 |
| Pisticci        | 0.93549  | 0.02883  |
| Policoro        | 0.945418 | 0.132348 |
| Pomarico        | 0.727282 | 0.002374 |
| Rotondella      | 0.799359 | 0.027967 |
| Salandra        | 0.955074 | 0.469309 |
| San Giorgio     | 0.782103 | 0.055727 |
| San Mauro       | 0.855823 | 0.175548 |
| Stigliano       | 0.981402 | 0.263808 |
| Tricarico       | 0.835324 | 0.004868 |
| Tursi           | 0.80125  | 0.002097 |
| Valsinni        | 0.678816 | 0.001913 |
| Scanzano        | 0.814742 | 0.120274 |



Supplementary Table 3. SHR for cardiovascular diseases

| Municipality | SHR (vs Ita) | p-value  |
|--------------|--------------|----------|
| Abriola      | 1.032298     | 0.379004 |
| Acerenza     | 0.887997     | 0.073948 |
| AlbanoDiLu   | 0.852013     | 0.067728 |
| Anzi         | 0.983351     | 0.033387 |
| Armento      | 1.925083     | 0.001183 |
| Atella       | 0.902562     | 0.068342 |
| Avigliano    | 0.844209     | 0.000745 |
| Balvano      | 0.852359     | 0.041257 |
| Banzi        | 1.649063     | 0.002367 |
| Baragiano    | 1.120262     | 0.028392 |
| Barile       | 1.149812     | 0.004175 |
| Bella        | 0.725435     | 0.000881 |
| Brienza      | 0.958336     | 0.48173  |
| BrindisiMor  | 0.921982     | 0.46011  |
| Calvello     | 0.943264     | 0.250609 |
| Calvera      | 1.620672     | 0.001266 |
| Campomaç     | 0.839967     | 0.130778 |
| Cancellara   | 0.701622     | 9.92E-05 |
| Carbone      | 1.03957      | 0.308691 |
| Castelgran   | 0.84283      | 0.104758 |
| Castellucci  | 0.956959     | 0.391244 |
| Castellucci  | 1.154982     | 0.12     |
| Castelmez    | 0.735363     | 0.01226  |
| Castelsara   | 1.191184     | 0.011265 |
| Castronuov   | 1.18346      | 0.035481 |
| Cersosimo    | 0.949548     | 0.30956  |
| Chiaromon    | 1.333187     | 0.002149 |
| CorletoPer   | 1.174976     | 0.002053 |
| Episcopia    | 1.180176     | 0.017652 |
| Fardella     | 1.010665     | 0.175146 |
| Filiano      | 1.041781     | 0.355209 |
| Forenza      | 1.840551     | 0.002219 |
| Franravilla  | 1.608453     | 0.002255 |
| Galicchio    | 1.093629     | 0.3275   |
| GenzanoDi    | 1.269826     | 0.001628 |
| Ginestra     | 1.709038     | 0.001536 |
| Grumenton    | 1.165579     | 0.016689 |
| GuardiaPe    | 1.672736     | 0.00427  |
| Lagonegro    | 1.114245     | 0.00188  |
| Latronico    | 0.76196      | 0.00092  |
| Laurenzan    | 0.819761     | 0.010237 |
| Lauria       | 1.188131     | 0.001725 |
| Lavello      | 1.137929     | 0.001413 |
| Maratea      | 1.272028     | 0.001425 |
| MarsicoNu    | 1.080707     | 0.053178 |
| Marsicovet   | 1.129069     | 0.001575 |
| Maschito     | 1.786065     | 0.001245 |
| Melfi        | 1.230634     | 0.001982 |
| Missanello   | 0.952151     | 0.236731 |
| Moliterno    | 0.952425     | 0.409848 |

|              |          |          |
|--------------|----------|----------|
| Montemilior  | 1.573062 | 0.001655 |
| Montemurr    | 2.043047 | 0.001655 |
| MuroLucar    | 0.672078 | 0.000814 |
| Nemoli       | 1.334521 | 0.001068 |
| Noepoli      | 1.06291  | 0.470856 |
| OppidoLuc    | 0.771599 | 0.000381 |
| PalazzoSai   | 1.911806 | 0.001827 |
| Paterno      | 1.333826 | 0.001601 |
| Pescopaga    | 1.298657 | 0.001768 |
| Picerno      | 0.935857 | 0.141447 |
| Pietragalla  | 0.880235 | 0.013704 |
| Pietraperto  | 0.823859 | 0.053964 |
| Pignola      | 0.86393  | 0.000836 |
| Potenza      | 0.990195 | 0.069158 |
| Rapolla      | 1.274788 | 0.001641 |
| Rapone       | 0.986043 | 0.03046  |
| RioneroInV   | 1.027186 | 0.046244 |
| Ripacandic   | 1.328238 | 0.001782 |
| Rivello      | 1.333166 | 0.001562 |
| Roccanova    | 1.128962 | 0.067539 |
| Rotonda      | 1.290804 | 0.00131  |
| Ruoti        | 1.018301 | 0.374769 |
| RuvoDelMc    | 1.029558 | 0.336833 |
| SanChirico   | 1.2147   | 0.005056 |
| SanChirico   | 0.760346 | 0.004028 |
| SanCostan    | 1.066382 | 0.493728 |
| SanFele      | 0.943839 | 0.389454 |
| SanMartinc   | 1.036836 | 0.310759 |
| SanPaoloA    | 0.80068  | 0.183967 |
| SanSeverir   | 0.983834 | 0.052301 |
| SantAngelc   | 1.42505  | 0.001614 |
| SantArcanç   | 1.006558 | 0.249911 |
| Sarconi      | 0.997293 | 0.071582 |
| SassoDiCa    | 0.934139 | 0.434999 |
| SatrianoDil  | 1.224629 | 0.001768 |
| SavoiaDiLu   | 1.100785 | 0.232957 |
| Senise       | 1.013606 | 0.467438 |
| Spinoso      | 0.816564 | 0.018635 |
| Teana        | 1.156578 | 0.177808 |
| TerranovaI   | 0.853192 | 0.084949 |
| Tito         | 0.733721 | 0.000888 |
| Tolve        | 0.932616 | 0.24126  |
| Tramutola    | 1.135636 | 0.006129 |
| Trecchina    | 1.385616 | 0.001183 |
| Trivigno     | 1.304579 | 0.006194 |
| VaglioBasil  | 0.776965 | 0.000997 |
| Venosa       | 1.45775  | 0.001797 |
| VietriDiPotr | 1.003518 | 0.152152 |
| Viggianello  | 1.165553 | 0.001461 |
| Viggiano     | 1.445361 | 0.003243 |
| Accettura    | 1.059441 | 0.387893 |
| Aliano       | 1.17283  | 0.068817 |

|                 |          |          |
|-----------------|----------|----------|
| Bernalda        | 1.179388 | 0.001637 |
| Calciano        | 1.496851 | 0.002324 |
| Cirigliano      | 1.243511 | 0.156141 |
| Colobraro       | 0.926538 | 0.363999 |
| Craco           | 1.348944 | 0.001743 |
| Ferrandina      | 1.042962 | 0.163712 |
| Garaguso        | 1.297082 | 0.001898 |
| Gorgoglion      | 1.488014 | 0.00266  |
| Grassano        | 1.174175 | 0.001749 |
| Grottole        | 1.195995 | 0.002342 |
| Irsina          | 1.157892 | 0.001571 |
| Matera          | 0.947339 | 0.000439 |
| Miglionico      | 0.900247 | 0.089626 |
| Montalbano      | 0.967058 | 0.372183 |
| Montescaglioso  | 0.838541 | 0.000823 |
| Nova Siri       | 0.701913 | 0.000393 |
| Oliveto Lucania | 1.363667 | 0.010665 |
| Pisticci        | 1.204588 | 0.001868 |
| Policoro        | 0.942002 | 0.021849 |
| Pomarico        | 0.870617 | 0.006293 |
| Rotondella      | 0.985414 | 0.168819 |
| Salandra        | 1.127695 | 0.022381 |
| San Giorgio     | 0.935607 | 0.428596 |
| San Mauro       | 1.018269 | 0.214953 |
| Scanzano        | 0.940856 | 0.090634 |
| Stigliano       | 1.415297 | 0.001597 |
| Tricarico       | 1.479993 | 0.002093 |
| Tursi           | 0.843462 | 0.000582 |
| Valsinni        | 1.030865 | 0.32901  |

Supplementary Table 4. SMR for cardiovascular diseases

| Municipality | SMR (vs It) | p-value  |
|--------------|-------------|----------|
| Abriola      | 1.367895    | 0.00113  |
| Acerenza     | 1.199822    | 0.014665 |
| AlbanoDiLu   | 1.369018    | 0.002144 |
| Anzi         | 1.143748    | 0.288447 |
| Armento      | 1.100874    | 0.455008 |
| Atella       | 0.903432    | 0.142653 |
| Avigliano    | 1.253237    | 0.000156 |
| Balvano      | 1.400201    | 0.000334 |
| Banzi        | 1.082237    | 5.21E-05 |
| Baragiano    | 1.169542    | 0.063288 |
| Barile       | 0.793108    | 0.022098 |
| Bella        | 0.970722    | 0.446675 |
| Brienza      | 1.330011    | 0.000152 |
| BrindisiMor  | 1.162563    | 0.226025 |
| Calvello     | 1.378039    | 0.002467 |
| Calvera      | 1.219813    | 0.166962 |
| Campomaç     | 1.185223    | 0.182104 |
| Cancellara   | 1.15208     | 0.033512 |
| Carbone      | 0.830633    | 0.164273 |
| SanPaoloA    | 0.764426    | 0.057057 |
| Castelgran   | 1.244687    | 0.018067 |
| Castellucci  | 1.246331    | 0.06327  |
| Castellucci  | 0.985925    | 0.144204 |
| Castelmez    | 0.951747    | 0.46127  |
| Castelsara   | 1.073536    | 0.497472 |
| Castronuov   | 1.143731    | 0.310563 |
| Cersosimo    | 1.32248     | 0.002284 |
| Chiaromon    | 1.129442    | 0.142451 |
| CorletoPer   | 1.456381    | 0.000408 |
| Episcopia    | 1.065038    | 0.034991 |
| Fardella     | 1.110733    | 0.253929 |
| Filiano      | 1.384706    | 5.93E-05 |
| Forenza      | 1.148587    | 0.171011 |
| Franravilla  | 1.018493    | 0.000188 |
| Gallicchio   | 0.833453    | 0.006542 |
| GenzanoDi    | 0.806258    | 0.276683 |
| Grumenton    | 1.160278    | 0.210183 |
| GuardiaPe    | 1.333431    | 0.038272 |
| Lagonegro    | 1.332923    | 0.000134 |
| Latronico    | 1.1659      | 0.012242 |
| Laurenzan    | 1.152774    | 0.116405 |
| Lauria       | 1.276947    | 9.7E-05  |
| Lavello      | 1.037924    | 0.096091 |
| Maratea      | 1.180324    | 0.017272 |
| MarsicoNu    | 1.180517    | 0.01268  |
| Marsicovet   | 1.060466    | 0.105002 |
| Maschito     | 1.051601    | 0.229952 |
| Melfi        | 1.085163    | 0.401918 |
| Missanello   | 1.435924    | 0.014759 |
| Moliterno    | 1.112531    | 0.207636 |

|              |          |          |
|--------------|----------|----------|
| Montemilior  | 1.005002 | 0.171573 |
| Montemurr    | 1.283174 | 0.021899 |
| MuroLucar    | 0.945763 | 0.204123 |
| Nemoli       | 1.408724 | 0.000848 |
| Noepoli      | 1.54653  | 0.0001   |
| OppidoLuc    | 1.25091  | 0.007761 |
| PalazzoSai   | 1.214348 | 0.011417 |
| Pescopage    | 1.118146 | 0.252112 |
| Picerno      | 0.966452 | 0.415901 |
| Pietragalla  | 1.013144 | 0.175558 |
| Pietraperto  | 1.259375 | 0.000259 |
| Pignola      | 1.203323 | 0.105392 |
| Potenza      | 1.09019  | 0.358059 |
| Rapolla      | 1.039624 | 0.152362 |
| Rapone       | 0.914263 | 0.181367 |
| RioneroInV   | 1.136355 | 0.372947 |
| Ripacandic   | 1.104555 | 0.026077 |
| Rivello      | 1.014824 | 0.12051  |
| Roccanova    | 1.2973   | 0.000798 |
| Rotonda      | 1.13688  | 0.238166 |
| Ruoti        | 1.431882 | 0.000161 |
| RuvoDelMc    | 1.016587 | 0.055986 |
| SanChirico   | 0.857584 | 0.16044  |
| SanChirico   | 0.997771 | 0.152266 |
| SanCostan    | 1.050176 | 0.272154 |
| SanFele      | 1.174826 | 0.184261 |
| SanMartinc   | 0.850733 | 0.006913 |
| SanSeverir   | 1.013105 | 0.018636 |
| SantAngelc   | 0.889017 | 0.401355 |
| SantArcanç   | 1.284565 | 0.006987 |
| Sarconi      | 1.138821 | 0.279304 |
| SassoDiCa    | 1.148976 | 0.029881 |
| SatrianoDil  | 1.372466 | 0.004498 |
| SavoiaDiLu   | 1.219901 | 0.136711 |
| Senise       | 1.356998 | 0.001138 |
| Spinoso      | 1.059511 | 0.33186  |
| Teana        | 1.315947 | 0.000105 |
| TerranovaI   | 1.5275   | 0.000149 |
| Tito         | 1.260153 | 0.111985 |
| Tolve        | 1.245691 | 0.029991 |
| Tramutola    | 1.125512 | 0.102177 |
| Trecchina    | 1.151174 | 0.070638 |
| Trivigno     | 1.147624 | 0.175758 |
| VaglioBasil  | 1.194908 | 0.040486 |
| Venosa       | 1.057502 | 0.29382  |
| VietriDiPotr | 1.096285 | 0.372102 |
| Viggianello  | 0.905412 | 0.007464 |
| Viggiano     | 1.191743 | 0.035021 |
| Ginestra     | 1.261153 | 0.001921 |
| Paterno      | 1.478815 | 2.69E-05 |
| Accettura    | 1.286978 | 0.001979 |
| Aliano       | 0.890703 | 0.272809 |

|                 |          |          |
|-----------------|----------|----------|
| Bernalda        | 1.190636 | 0.001647 |
| Calciano        | 1.202327 | 0.211101 |
| Cirigliano      | 0.998458 | 0.001177 |
| Colobraro       | 1.12187  | 0.338148 |
| Craco           | 1.622501 | 0.001965 |
| Ferrandina      | 1.088063 | 0.123264 |
| Garaguso        | 1.360586 | 0.018671 |
| Gorgoglion      | 1.131599 | 0.417256 |
| Grassano        | 1.078269 | 0.287559 |
| Grottole        | 1.334351 | 0.001898 |
| Irsina          | 1.207991 | 0.001755 |
| Matera          | 0.953495 | 0.00168  |
| Miglionico      | 1.049481 | 0.337369 |
| Montalbano      | 1.17381  | 0.005194 |
| Montescaglioso  | 0.98115  | 0.03755  |
| Nova Siri       | 1.007583 | 0.199704 |
| Oliveto Lucania | 1.307958 | 0.111543 |
| Pisticci        | 1.224014 | 0.001341 |
| Policoro        | 1.036794 | 0.408215 |
| Pomarico        | 1.223232 | 0.008149 |
| Rotondella      | 1.102612 | 0.25142  |
| Salandra        | 1.200775 | 0.050078 |
| San Giorgio     | 1.195363 | 0.063039 |
| San Mauro       | 0.982742 | 0.134741 |
| Stigliano       | 0.957303 | 0.445434 |
| Tricarico       | 1.210641 | 0.001711 |
| Tursi           | 1.086817 | 0.228512 |
| Valsinni        | 1.083584 | 0.312047 |
| Scanzano        | 1.251189 | 0.026573 |

Supplementary Table 5. SMR for cardiovascular diseases, 1980-1998

| Municipality | SMR (vs It) | p-value  |
|--------------|-------------|----------|
| Abriola      | 0.925903    | 0.360772 |
| Acerenza     | 1.065392    | 0.191435 |
| AlbanoDiLu   | 1.12413     | 0.13429  |
| Anzi         | 0.959707    | 0.270142 |
| Armento      | 1.129741    | 0.150598 |
| Atella       | 0.959592    | 0.324191 |
| Avigliano    | 1.192808    | 0.001718 |
| Balvano      | 1.089545    | 0.205755 |
| Banzi        | 0.871612    | 0.099333 |
| Baragiano    | 0.915757    | 0.232095 |
| Barile       | 0.799708    | 0.000203 |
| Bella        | 0.932283    | 0.184832 |
| Brienza      | 1.077395    | 0.122561 |
| BrindisiMor  | 1.33027     | 0.004561 |
| Calvello     | 1.328859    | 0.008325 |
| Calvera      | 1.171944    | 0.21337  |
| Campomaç     | 1.105673    | 0.337638 |
| Cancellara   | 1.206886    | 0.014995 |
| Carbone      | 0.994807    | 0.072311 |
| SanPaoloA    | 1.05929     | 0.442558 |
| Castelgran   | 1.303842    | 0.002067 |
| Castellucci  | 1.56263     | 0.001878 |
| Castellucci  | 1.018847    | 0.216523 |
| Castelmez    | 0.973431    | 0.051155 |
| Castelsara   | 0.869597    | 0.055071 |
| Castronuov   | 1.122761    | 0.265434 |
| Cersosimo    | 1.05398     | 0.345213 |
| Chiaromon    | 1.196742    | 0.00165  |
| CorletoPer   | 1.08324     | 0.311722 |
| Episcopia    | 0.936117    | 0.274961 |
| Fardella     | 1.173755    | 0.004243 |
| Filiano      | 1.170501    | 0.002807 |
| Forenza      | 1.397051    | 0.00285  |
| Franravilla  | 0.99689     | 0.064151 |
| Galicchio    | 0.88476     | 0.004345 |
| GenzanoDi    | 1.120354    | 0.280327 |
| Grumenton    | 1.176642    | 0.021313 |
| GuardiaPe    | 1.471627    | 0.005263 |
| Lagonegro    | 1.265807    | 0.001863 |
| Latronico    | 1.262176    | 0.001413 |
| Laurenzan    | 1.122833    | 0.039765 |
| Lauria       | 1.158975    | 0.002202 |
| Lavello      | 1.005873    | 0.379591 |
| Maratea      | 1.145419    | 0.001833 |
| MarsicoNu    | 1.035507    | 0.353421 |
| Marsicovet   | 1.351447    | 0.002018 |
| Maschito     | 1.229003    | 0.00161  |
| Melfi        | 1.103359    | 0.002517 |
| Missanello   | 1.291112    | 0.014239 |
| Moliterno    | 1.221735    | 0.001878 |

|              |          |          |
|--------------|----------|----------|
| Montemilor   | 1.160177 | 0.007404 |
| Montemurr    | 1.169459 | 0.016513 |
| MuroLucar    | 0.988371 | 0.001584 |
| Nemoli       | 1.233841 | 0.007909 |
| Noepoli      | 1.233254 | 0.006074 |
| OppidoLuc    | 1.248808 | 0.003078 |
| PalazzoSai   | 1.062531 | 0.106528 |
| Pescopaga    | 1.048595 | 0.348173 |
| Picerno      | 0.88716  | 0.075899 |
| Pietragalla  | 0.992364 | 0.042859 |
| Pietraperto  | 0.950411 | 0.340869 |
| Pignola      | 1.082399 | 0.256238 |
| Potenza      | 1.128647 | 0.045077 |
| Rapolla      | 1.032866 | 0.010701 |
| Rapone       | 0.946146 | 0.451129 |
| RioneroInV   | 0.913471 | 0.333484 |
| Ripacandic   | 1.01511  | 0.270592 |
| Rivello      | 1.120679 | 0.05201  |
| Roccanova    | 1.115186 | 0.034467 |
| Rotonda      | 0.9137   | 0.225302 |
| Ruoti        | 1.30412  | 0.001691 |
| RuvoDelMc    | 1.08301  | 0.15195  |
| SanChirico   | 0.869144 | 0.066964 |
| SanChirico   | 0.885409 | 0.133329 |
| SanCostan    | 1.070699 | 0.305604 |
| SanFele      | 1.390507 | 0.001677 |
| SanMartinc   | 1.049418 | 0.226021 |
| SanSeverir   | 0.846097 | 0.07332  |
| SantAngelc   | 0.882928 | 0.221134 |
| SantArcanç   | 1.057173 | 0.312183 |
| Sarconi      | 1.075252 | 0.374806 |
| SassoDiCa    | 1.246784 | 0.001344 |
| SatrianoDil  | 1.249754 | 0.019106 |
| SavoiaDiLu   | 1.213895 | 0.039169 |
| Senise       | 1.329638 | 0.002255 |
| Spinoso      | 0.796902 | 0.018809 |
| Teana        | 1.097457 | 0.031257 |
| TerranovaI   | 1.203389 | 0.011642 |
| Tito         | 1.349655 | 0.009307 |
| Tolve        | 1.309747 | 0.001746 |
| Tramutola    | 1.057362 | 0.253415 |
| Trecchina    | 1.071358 | 0.135256 |
| Trivigno     | 1.016446 | 0.367489 |
| VaglioBasil  | 1.093631 | 0.131951 |
| Venosa       | 1.110324 | 0.247677 |
| VietriDiPotr | 1.0148   | 0.211404 |
| Viggianello  | 0.96132  | 0.406746 |
| Viggiano     | 0.92149  | 0.216337 |
| Ginestra     | 1.150329 | 0.005017 |
| Paterno      | 1.07212  | 0.187225 |
| Accettura    | 1.049882 | 0.376688 |
| Aliano       | 1.291215 | 0.001405 |



|                |          |          |
|----------------|----------|----------|
| Bernalda       | 1.140016 | 0.001251 |
| Calciano       | 1.037014 | 0.282951 |
| Cirigliano     | 0.897036 | 0.322587 |
| Colobraro      | 1.086054 | 0.255522 |
| Craco          | 1.328484 | 0.003662 |
| Ferrandina     | 1.012838 | 0.276513 |
| Garaguso       | 1.166878 | 0.102619 |
| Gorgoglion     | 0.985268 | 0.00204  |
| Grassano       | 1.053254 | 0.221183 |
| Grottole       | 1.304258 | 0.001794 |
| Irsina         | 1.130699 | 0.001862 |
| Matera         | 0.949926 | 0.011812 |
| Miglionico     | 1.065248 | 0.351023 |
| Montalbano     | 1.128554 | 0.002911 |
| Montescaglioso | 1.016762 | 0.294329 |
| NovaSiri       | 0.949597 | 0.389154 |
| OlivetoLuciano | 1.289299 | 0.018501 |
| Pisticci       | 1.141126 | 0.001428 |
| Policoro       | 1.012631 | 0.252193 |
| Pomarico       | 0.9902   | 0.047743 |
| Rotondella     | 1.019162 | 0.25191  |
| Salandra       | 1.209565 | 0.002202 |
| SanGiorgio     | 1.250839 | 0.001262 |
| SanMauro       | 1.018105 | 0.252797 |
| Stigliano      | 1.006782 | 0.071822 |
| Tricarico      | 1.058481 | 0.10008  |
| Tursi          | 1.099739 | 0.012129 |
| Valsinni       | 1.169407 | 0.001356 |
| Scanzano       | 1.082477 | 0.281824 |

Supplementary Table 6. SMR for cardiovascular diseases, 1999-2014

| Municipality | SMR (vs It) | p-value  |
|--------------|-------------|----------|
| Abriola      | 1.381987    | 0.000514 |
| Acerenza     | 1.150745    | 0.043874 |
| AlbanoDiLu   | 1.300648    | 0.005625 |
| Anzi         | 1.078184    | 0.347936 |
| Armento      | 0.991682    | 0.167151 |
| Atella       | 0.998645    | 0.361049 |
| Avigliano    | 1.208454    | 0.000448 |
| Balvano      | 1.213161    | 0.033046 |
| Banzi        | 1.014648    | 0.160128 |
| Baragiano    | 1.180572    | 0.030234 |
| Barile       | 0.775978    | 0.00387  |
| Bella        | 0.983512    | 0.496451 |
| Brienza      | 1.279668    | 0.000444 |
| BrindisiMor  | 1.233179    | 0.079253 |
| Calvello     | 1.403074    | 0.00022  |
| Calvera      | 1.117929    | 0.428904 |
| Campomaç     | 1.23817     | 0.087413 |
| Cancellara   | 1.052073    | 0.35118  |
| Carbone      | 0.995787    | 0.134092 |
| SanPaoloA    | 0.915883    | 0.37263  |
| Castelgran   | 1.276868    | 0.003146 |
| Castellucci  | 1.246406    | 0.047839 |
| Castellucci  | 0.973029    | 0.197064 |
| Castelmez    | 0.923885    | 0.251749 |
| Castelsara   | 1.052263    | 0.286493 |
| Castronuov   | 1.142899    | 0.257309 |
| Cersosimo    | 1.316888    | 0.00093  |
| Chiaromon    | 1.175425    | 0.016997 |
| CorletoPer   | 1.457831    | 0.000416 |
| Episcopia    | 1.071436    | 0.000219 |
| Fardella     | 1.056871    | 0.364434 |
| Filiano      | 1.318983    | 0.000329 |
| Forenza      | 1.151158    | 0.09826  |
| Francavilla  | 1.07016     | 0.386605 |
| Galicchio    | 0.838972    | 0.002355 |
| GenzanoDi    | 0.892921    | 0.410233 |
| Grumenton    | 1.175911    | 0.122251 |
| GuardiaPe    | 1.369917    | 0.019654 |
| Lagonegro    | 1.239646    | 0.000426 |
| Latronico    | 1.147254    | 0.012637 |
| Laurenzan    | 1.24678     | 0.002964 |
| Lauria       | 1.280096    | 0.000384 |
| Lavello      | 1.045828    | 0.282951 |
| Maratea      | 1.142272    | 0.036899 |
| MarsicoNu    | 1.136173    | 0.043705 |
| Marsicovet   | 1.071504    | 0.42693  |
| Maschito     | 1.013408    | 0.085563 |
| Melfi        | 1.059583    | 0.310479 |
| Missanello   | 1.267372    | 0.088369 |
| Moliterno    | 1.118755    | 0.118716 |

|                    |          |          |
|--------------------|----------|----------|
| Montemilori        | 0.984619 | 0.383764 |
| Montemurro         | 1.325082 | 0.00302  |
| MuroLucara         | 0.947161 | 0.127487 |
| Nemoli             | 1.424256 | 0.000509 |
| Noepoli            | 1.37632  | 0.000388 |
| OppidoLucano       | 1.275514 | 0.000649 |
| PalazzoSanGiovanni | 1.198473 | 0.007059 |
| Pescopagani        | 1.085196 | 0.411529 |
| Picerno            | 0.924527 | 0.232059 |
| Pietragalla        | 0.988679 | 0.448989 |
| Pietrapertosa      | 1.234823 | 0.000487 |
| Pignola            | 1.250494 | 0.02572  |
| Potenza            | 1.085207 | 0.339799 |
| Rapolla            | 1.016045 | 0.406146 |
| Rapone             | 0.904691 | 0.070001 |
| RioneroInVulturno  | 1.112832 | 0.406181 |
| Ripacandina        | 1.058318 | 0.197539 |
| Rivello            | 1.090527 | 0.457143 |
| Roccanova          | 1.347146 | 0.000408 |
| Rotonda            | 1.078775 | 0.478588 |
| Ruoti              | 1.351289 | 0.000452 |
| RuvoDelMonte       | 1.053231 | 0.391196 |
| SanChirico         | 0.935999 | 0.29397  |
| SanChirico         | 0.945281 | 0.414229 |
| SanCostantino      | 1.087461 | 0.178703 |
| SanFele            | 1.333141 | 0.005075 |
| SanMartino         | 0.838554 | 0.002406 |
| SanSeverino        | 0.898808 | 0.291727 |
| SantAngelo         | 1.062098 | 0.020313 |
| SantArcangelo      | 1.19889  | 0.056445 |
| Sarconi            | 1.135266 | 0.272184 |
| SassoDiCastellana  | 1.240969 | 0.000519 |
| SatrianoDilivati   | 1.245543 | 0.041628 |
| SavoiaDiLunigiana  | 1.448219 | 0.001049 |
| Senise             | 1.465668 | 0.000379 |
| Spinoso            | 1.006984 | 0.078059 |
| Teana              | 1.257288 | 0.000394 |
| Terranova          | 1.486704 | 0.000441 |
| Tito               | 1.233103 | 0.139378 |
| Tolve              | 1.339132 | 0.000929 |
| Tramutola          | 1.120848 | 0.085381 |
| Trecchina          | 1.115706 | 0.140204 |
| Trivigno           | 1.17475  | 0.056227 |
| VaglioBasiliano    | 1.224703 | 0.009009 |
| Venosa             | 1.078076 | 0.438623 |
| VietriDiPotenza    | 1.053844 | 0.354393 |
| Viggianello        | 0.907799 | 0.002479 |
| Viggiano           | 1.11209  | 0.191002 |
| Ginestra           | 1.246277 | 0.000935 |
| Paterno            | 1.401685 | 0.000258 |
| Accettura          | 1.213903 | 0.004121 |
| Aliano             | 0.95066  | 0.396592 |

|                 |          |          |
|-----------------|----------|----------|
| Bernalda        | 1.160091 | 0.001417 |
| Calciano        | 1.202756 | 0.134794 |
| Cirigliano      | 0.91719  | 0.45645  |
| Colobraro       | 1.189693 | 0.055678 |
| Craco           | 1.678908 | 0.001509 |
| Ferrandina      | 1.045866 | 0.294658 |
| Garaguso        | 1.331845 | 0.007631 |
| Gorgoglion      | 1.251823 | 0.030009 |
| Grassano        | 1.044978 | 0.415929 |
| Grottole        | 1.398572 | 0.001162 |
| Irsina          | 1.147067 | 0.005956 |
| Matera          | 0.95225  | 0.00204  |
| Miglionico      | 1.159719 | 0.057101 |
| Montalbano      | 1.142868 | 0.004605 |
| Montescaglioso  | 0.979012 | 0.148195 |
| Nova Siri       | 1.014365 | 0.000867 |
| Oliveto Lucania | 1.2688   | 0.104769 |
| Pisticci        | 1.202688 | 0.001319 |
| Policoro        | 1.024691 | 0.399921 |
| Pomarico        | 1.161042 | 0.021994 |
| Rotondella      | 1.106006 | 0.137667 |
| Salandra        | 1.195451 | 0.019689 |
| San Giorgio     | 1.185998 | 0.030501 |
| San Mauro       | 0.968897 | 0.302106 |
| Stigliano       | 1.005229 | 0.198052 |
| Tricarico       | 1.183241 | 0.001436 |
| Tursi           | 1.118375 | 0.022483 |
| Valsinni        | 1.07706  | 0.223998 |
| Scanzano        | 1.157118 | 0.089569 |

Supplementary Table 7. SHR for respiratory diseases

| Municipality | SHR (vs Ita) | p-value  |
|--------------|--------------|----------|
| Abriola      | 1.350485     | 0.026064 |
| Acerenza     | 0.982153     | 0.227765 |
| AlbanoDiLu   | 0.803398     | 0.15844  |
| Anzi         | 1.32059      | 0.042304 |
| Armento      | 1.725736     | 0.002058 |
| Atella       | 1.342778     | 0.001859 |
| Avigliano    | 1.145185     | 0.017833 |
| Balvano      | 1.114686     | 0.491367 |
| Banzi        | 1.650108     | 0.002414 |
| Baragiano    | 1.45672      | 0.001511 |
| Barile       | 1.546652     | 0.004018 |
| Bella        | 1.768517     | 0.001252 |
| Brienza      | 1.304712     | 0.002055 |
| BrindisiMor  | 2.00485      | 0.001214 |
| Calvello     | 1.117175     | 0.421657 |
| Calvera      | 1.346219     | 0.269735 |
| Campomaç     | 1.13853      | 0.436677 |
| Cancellara   | 0.934056     | 0.428122 |
| Carbone      | 0.596071     | 0.052635 |
| Castelgran   | 3.081829     | 0.001402 |
| Castellucci  | 0.554954     | 0.000569 |
| Castellucci  | 1.032187     | 0.067017 |
| Castelmez    | 1.094619     | 0.296319 |
| Castelsara   | 0.782144     | 0.099472 |
| Castronuov   | 0.905821     | 0.49096  |
| Cersosimo    | 0.686031     | 0.122012 |
| Chiaromon    | 0.844254     | 0.154772 |
| CorletoPer   | 1.081566     | 0.416477 |
| Episcopia    | 0.970297     | 0.249167 |
| Fardella     | 0.476516     | 0.008016 |
| Filiano      | 1.221945     | 0.058974 |
| Forenza      | 1.769773     | 0.002279 |
| Francavilla  | 1.186884     | 0.072104 |
| Galicchio    | 1.155867     | 0.498817 |
| GenzanoDi    | 1.28248      | 0.001727 |
| Ginestra     | 2.247485     | 0.00164  |
| Grumenton    | 0.906608     | 0.383921 |
| GuardiaPe    | 2.304204     | 0.004101 |
| Lagonegro    | 0.685743     | 0.000632 |
| Latronico    | 0.432701     | 0.000828 |
| Laurenzan    | 1.03638      | 0.124618 |
| Lauria       | 0.679892     | 0.000533 |
| Lavello      | 1.280518     | 0.001522 |
| Maratea      | 0.734818     | 0.000642 |
| MarsicoNu    | 1.07171      | 0.457106 |
| Marsicovet   | 1.003962     | 0.077731 |
| Maschito     | 1.642203     | 0.00136  |
| Melfi        | 1.660913     | 0.002059 |
| Missanello   | 1.702285     | 0.00992  |
| Moliterno    | 1.031493     | 0.149114 |

|              |          |          |
|--------------|----------|----------|
| Montemilior  | 1.369945 | 0.016302 |
| Montemurr    | 1.908877 | 0.001753 |
| MuroLucar    | 1.907289 | 0.00134  |
| Nemoli       | 0.693726 | 0.031012 |
| Noepoli      | 0.863527 | 0.370429 |
| OppidoLuc    | 0.762999 | 0.004488 |
| PalazzoSai   | 1.728144 | 0.001914 |
| Paterno      | 1.437294 | 0.001702 |
| Pescopaga    | 3.90785  | 0.001859 |
| Picerno      | 0.984693 | 0.31556  |
| Pietragalla  | 1.358877 | 0.001271 |
| Pietraperto  | 1.113859 | 0.373359 |
| Pignola      | 1.199144 | 0.011575 |
| Potenza      | 1.136478 | 0.001445 |
| Rapolla      | 1.904915 | 0.00174  |
| Rapone       | 1.887173 | 0.002044 |
| RioneroInV   | 1.70901  | 0.003338 |
| Ripacandic   | 1.355205 | 0.021839 |
| Rivello      | 0.550957 | 0.000588 |
| Roccanova    | 1.216437 | 0.186509 |
| Rotonda      | 0.919713 | 0.315623 |
| Ruoti        | 1.188264 | 0.086057 |
| RuvoDelMc    | 2.364375 | 0.002059 |
| SanChirico   | 1.876031 | 0.001477 |
| SanChirico   | 0.643686 | 0.006119 |
| SanCostan    | 0.816315 | 0.316092 |
| SanFele      | 1.791644 | 0.001792 |
| SanMartinc   | 1.134414 | 0.424119 |
| SanPaoloA    | 0.82545  | 0.421222 |
| SanSeverir   | 0.763575 | 0.05383  |
| SantAngelc   | 2.119133 | 0.001714 |
| SantArcanç   | 1.024954 | 0.111942 |
| Sarconi      | 0.9286   | 0.441742 |
| SassoDiCa    | 1.099797 | 0.294191 |
| SatrianoDil  | 1.310617 | 0.018434 |
| SavoiaDiLu   | 1.833524 | 0.001391 |
| Senise       | 0.853381 | 0.01663  |
| Spinoso      | 0.703184 | 0.02947  |
| Teana        | 0.758762 | 0.238375 |
| TerranovaI   | 1.13324  | 0.495943 |
| Tito         | 0.780563 | 0.000802 |
| Tolve        | 1.154861 | 0.181615 |
| Tramutola    | 1.139462 | 0.27364  |
| Trecchina    | 0.881294 | 0.255899 |
| Trivigno     | 1.539584 | 0.019767 |
| VaglioBasil  | 0.831883 | 0.146403 |
| Venosa       | 1.156329 | 0.009185 |
| VietriDiPotr | 1.075417 | 0.406746 |
| Viggianello  | 1.125053 | 0.321119 |
| Viggiano     | 1.500558 | 0.003202 |
| Accettura    | 1.158761 | 0.193396 |
| Aliano       | 0.919283 | 0.320235 |

|                 |          |          |
|-----------------|----------|----------|
| Bernalda        | 1.047314 | 0.227597 |
| Calciano        | 1.440028 | 0.034097 |
| Cirigliano      | 1.228067 | 0.472596 |
| Colobraro       | 0.928324 | 0.319539 |
| Craco           | 1.539882 | 0.008082 |
| Ferrandina      | 1.075338 | 0.138766 |
| Garaguso        | 1.646925 | 0.001598 |
| Gorgoglion      | 1.795739 | 0.002174 |
| Grassano        | 1.63749  | 0.001483 |
| Grottole        | 1.60049  | 0.001935 |
| Irsina          | 1.182337 | 0.015235 |
| Matera          | 0.90847  | 0.001464 |
| Miglionico      | 1.46986  | 0.001407 |
| Montalbano      | 0.829078 | 0.017063 |
| Montescagliano  | 0.799649 | 0.001116 |
| Nova Siri       | 0.831109 | 0.022552 |
| Oliveto Lucania | 2.019045 | 0.001708 |
| Pisticci        | 0.923657 | 0.157455 |
| Policoro        | 0.984016 | 0.045729 |
| Pomarico        | 0.963333 | 0.171016 |
| Rotondella      | 0.879778 | 0.322857 |
| Salandra        | 0.946495 | 0.294701 |
| San Giorgio     | 1.028025 | 0.201178 |
| San Mauro       | 1.208307 | 0.11882  |
| Scanzano        | 1.089498 | 0.12355  |
| Stigliano       | 1.149659 | 0.0532   |
| Tricarico       | 2.207212 | 0.001746 |
| Tursi           | 0.99281  | 0.0984   |
| Valsinni        | 0.958723 | 0.149146 |

Supplementary Table 8. SMR for respiratory diseases

| Municipality | SMR (vs It) | p-value  |
|--------------|-------------|----------|
| Abriola      | 1.922294    | 0.004434 |
| Acerenza     | 1.216155    | 0.192577 |
| AlbanoDiLu   | 0.485852    | 0.028735 |
| Anzi         | 1.019721    | 0.076294 |
| Armento      | 1.526278    | 0.175606 |
| Atella       | 0.886091    | 0.295019 |
| Avigliano    | 1.223157    | 0.032307 |
| Balvano      | 0.733333    | 0.278256 |
| Banzi        | 0.939835    | 0.233772 |
| Baragiano    | 0.838427    | 0.492451 |
| Barile       | 1.061807    | 0.195851 |
| Bella        | 0.993941    | 0.215711 |
| Brienza      | 1.047568    | 0.347534 |
| BrindisiMor  | 1.423971    | 0.230127 |
| Calvello     | 1.215655    | 0.406982 |
| Calvera      | 0.984838    | 0.066259 |
| Campomaç     | 1.166273    | 0.438597 |
| Cancellara   | 0.691704    | 0.056981 |
| Carbone      | 0.718764    | 0.332177 |
| SanPaoloA    | 1.69603     | 0.024475 |
| Castelgran   | 0.971311    | 0.073553 |
| Castellucci  | 0.808571    | 0.259499 |
| Castellucci  | 0.781595    | 0.23721  |
| Castelmez    | 0.788446    | 0.369204 |
| Castelsara   | 0.812831    | 0.477708 |
| Castronuov   | 0.919359    | 0.004571 |
| Cersosimo    | 1.182437    | 0.433827 |
| Chiaromon    | 1.185698    | 0.269611 |
| CorletoPer   | 1.100398    | 0.325237 |
| Episcopia    | 0.925749    | 0.006775 |
| Fardella     | 1.011494    | 0.230897 |
| Filiano      | 1.16715     | 0.425164 |
| Forenza      | 0.709299    | 0.043536 |
| Francavilla  | 0.753297    | 0.412443 |
| Galicchio    | 0.901901    | 0.383811 |
| GenzanoDi    | 1.979088    | 0.016869 |
| Grumenton    | 1.398891    | 0.168849 |
| GuardiaPe    | 1.591129    | 0.251194 |
| Lagonegro    | 0.93409     | 0.004883 |
| Latronico    | 0.930678    | 0.004479 |
| Laurenzan    | 0.954958    | 0.071408 |
| Lauria       | 1.250458    | 0.012615 |
| Lavello      | 0.680175    | 0.000775 |
| Maratea      | 0.707426    | 0.042725 |
| MarsicoNu    | 1.124746    | 0.343007 |
| Marsicovet   | 1.4412      | 0.048339 |
| Maschito     | 0.778076    | 0.384466 |
| Melfi        | 0.945612    | 0.182309 |
| Missanello   | 0.896935    | 0.005306 |
| Moliterno    | 0.903093    | 0.35794  |



|              |          |          |
|--------------|----------|----------|
| Montemilior  | 1.300013 | 0.204513 |
| Montemurr    | 1.079171 | 0.224944 |
| MuroLucar    | 1.122675 | 0.29767  |
| Nemoli       | 0.974041 | 0.105907 |
| Noepoli      | 0.746284 | 0.329209 |
| OppidoLuc    | 1.333159 | 0.09951  |
| PalazzoSai   | 0.925203 | 0.160035 |
| Pescopage    | 1.063616 | 0.274517 |
| Picerno      | 0.975451 | 0.070755 |
| Pietragalla  | 0.989432 | 0.174633 |
| Pietraperto  | 1.231983 | 0.117841 |
| Pignola      | 0.629218 | 0.130265 |
| Potenza      | 1.093833 | 0.494537 |
| Rapolla      | 1.198663 | 0.004761 |
| Rapone       | 0.818859 | 0.33472  |
| RioneroInV   | 0.925618 | 0.005359 |
| Ripacandic   | 1.011587 | 0.113738 |
| Rivello      | 0.810864 | 0.444954 |
| Roccanova    | 0.533541 | 0.004125 |
| Rotonda      | 0.75764  | 0.370422 |
| Ruoti        | 0.781746 | 0.254093 |
| RuvoDelMc    | 0.791065 | 0.32988  |
| SanChirico   | 1.024952 | 0.126212 |
| SanChirico   | 1.076033 | 0.317499 |
| SanCostan    | 0.724045 | 0.044769 |
| SanFele      | 1.477694 | 0.139761 |
| SanMartinc   | 1.107069 | 0.447717 |
| SanSeverir   | 1.266426 | 0.434017 |
| SantAngelc   | 0.964481 | 0.006908 |
| SantArcanç   | 0.692094 | 0.120113 |
| Sarconi      | 1.317435 | 0.251512 |
| SassoDiCa    | 1.011673 | 0.228671 |
| SatrianoDil  | 1.399275 | 0.18681  |
| SavoiaDiLu   | 1.03692  | 0.12734  |
| Senise       | 1.266065 | 0.311442 |
| Spinoso      | 0.686427 | 0.201003 |
| Teana        | 0.750304 | 0.086354 |
| TerranovaI   | 1.125396 | 0.430813 |
| Tito         | 0.905498 | 0.004785 |
| Tolve        | 0.719626 | 0.169081 |
| Tramutola    | 1.095352 | 0.481747 |
| Trecchina    | 0.439535 | 0.00031  |
| Trivigno     | 0.918258 | 0.005372 |
| VaglioBasil  | 0.425002 | 0.001296 |
| Venosa       | 0.71048  | 0.334512 |
| VietriDiPotr | 1.11593  | 0.49463  |
| Viggianello  | 0.861168 | 0.198602 |
| Viggiano     | 1.311081 | 0.101575 |
| Ginestra     | 0.573592 | 0.006853 |
| Paterno      | 0.927085 | 0.35408  |
| Accettura    | 0.806458 | 0.423186 |
| Aliano       | 0.822806 | 0.458913 |

|                     |          |          |
|---------------------|----------|----------|
| Bernalda            | 0.871158 | 0.170368 |
| Calciano            | 0.759734 | 0.335993 |
| Cirigliano          | 1.099077 | 0.071916 |
| Colobraro           | 0.864941 | 0.455122 |
| Craco               | 1.237016 | 0.482587 |
| Ferrandina          | 0.988825 | 0.335144 |
| Garaguso            | 0.73772  | 0.411309 |
| Gorgoglion          | 1.6247   | 0.06503  |
| Grassano            | 1.155827 | 0.486908 |
| Grottole            | 1.539815 | 0.033409 |
| Irsina              | 0.7836   | 0.105687 |
| Matera              | 0.923147 | 0.003441 |
| Miglionico          | 0.802873 | 0.419391 |
| Montalbano          | 1.156816 | 0.423075 |
| Montescaglioso      | 0.666857 | 0.004127 |
| Nova Siri           | 0.969853 | 0.364782 |
| Oliveto Lucania     | 1.536173 | 0.195149 |
| Pisticci            | 0.908357 | 0.104966 |
| Policoro            | 1.058552 | 0.092669 |
| Pomarico            | 1.068404 | 0.067367 |
| Rotondella          | 1.286775 | 0.166538 |
| Salandra            | 1.067883 | 0.037754 |
| San Giorgio Lucania | 0.302101 | 0.00375  |
| San Mauro Lucania   | 1.236737 | 0.371509 |
| Stigliano           | 1.124766 | 0.415146 |
| Tricarico           | 0.841863 | 0.140093 |
| Tursi               | 1.277119 | 0.113008 |
| Valsinni            | 0.93664  | 0.37157  |
| Scanzano Lucania    | 0.749697 | 0.370498 |
